# Supplementary material for: V2I-VTL: IoT-Enabled adaptive traffic light controller and emission reduction at intersection
Source: PeerJ journal article supplement (doi:10.7717/peerj-cs.2507), 2024-11-29
Supplement: code.zip [file code.zip]

## URBAN INTERSECTION BEIJING

### Short description

---

Busy urban intersection with numerous modes of traffic including cyclists and pedestrians.

### Objective

---

The focus on this model is the integration of large amount of cyclists in the operation of a signalized urban intersection.
